# Supplementary material
Source: PubMed Central journal article supplement (PMC5744702)
Supplement: EHP793.s001.acco.pdf [file EHP793.s001.acco.pdf]

**Note to readers with disabilities:** *EHP* strives to ensure that all journal content is accessible to all readers. However, some figures and Supplemental Material published in *EHP* articles may not conform to [508 standards](#) due to the complexity of the information being presented. If you need assistance accessing journal content, please contact [ehp508@niehs.nih.gov](mailto:ehp508@niehs.nih.gov). Our staff will work with you to assess and meet your accessibility needs within 3 working days.

**Supplemental Material**

**Pesticide use and age-related macular degeneration  
in the Agricultural Health Study**

Martha P. Montgomery, Eric Postel, David M. Umbach, Marie Richards, Mary Watson, Aaron Blair, Honglei Chen, Dale P. Sandler, Silke Schmidt, Freya Kamel

**Table of Contents**

**Table S1.** Characteristics of early and late incident AMD cases and controls, AHS 1993-2007 ...3

**Table S2.** Incident AMD and ever use of specific pesticides, stratified by gender, AHS 1993-2007.....4

**Table S3.** Incident early and late AMD and ever use of specific pesticides, AHS 1993-2007.....6

**Table S4.** Association of AMD with pesticides modeled as pairs .....7

**Table S5.** Association of AMD with selected pesticides and pesticide groups. Comparison of ORs from the manuscript with those calculated after imputing case-control status to individuals not screened. ....8

Quantitative Bias Analysis.....9

References.....11

**Supplemental Table S1. Characteristics of early and late incident AMD cases and controls, AHS 1993-2007**

| Characteristic                  | Control |    | Early AMD (N = 57) |    |                 |           | Late AMD (N = 72) |    |                 |           |
|---------------------------------|---------|----|--------------------|----|-----------------|-----------|-------------------|----|-----------------|-----------|
|                                 | N       | %  | N                  | %  | OR <sup>a</sup> | 95% CI    | N                 | %  | OR <sup>a</sup> | 95% CI    |
| Age                             |         |    |                    |    |                 |           |                   |    |                 |           |
| 50-69                           | 28801   | 74 | 15                 | 26 | 1.0             | Reference | 13                | 18 | 1.0             | Reference |
| 70-79                           | 8286    | 21 | 31                 | 54 | 7.2             | 3.9 13.3  | 35                | 49 | 9.2             | 4.9 17.5  |
| 80+                             | 2021    | 5  | 11                 | 19 | 10.7            | 4.9 23.5  | 24                | 33 | 26.4            | 13.4 52.1 |
| Gender                          |         |    |                    |    |                 |           |                   |    |                 |           |
| Men                             | 22658   | 58 | 33                 | 58 | 1.0             | Reference | 46                | 64 | 1.0             | Reference |
| Women                           | 16450   | 42 | 24                 | 42 | 1.3             | 0.7 2.3   | 26                | 36 | 1.1             | 0.6 1.8   |
| Race/ethnicity                  |         |    |                    |    |                 |           |                   |    |                 |           |
| White, non-Hispanic             | 37984   | 97 | 56                 | 98 | 1.0             | Reference | 70                | 97 | 1.0             | Reference |
| Other                           | 1124    | 3  | 1                  | 2  | 0.5             | 0.1 3.6   | 2                 | 3  | 0.7             | 0.2 3.0   |
| State                           |         |    |                    |    |                 |           |                   |    |                 |           |
| Iowa                            | 25612   | 65 | 38                 | 67 | 1.0             | Reference | 33                | 46 | 1.0             | Reference |
| North Carolina                  | 13496   | 35 | 19                 | 33 | 0.7             | 0.4 1.2   | 39                | 54 | 1.5             | 0.9 2.4   |
| Education                       |         |    |                    |    |                 |           |                   |    |                 |           |
| ≤ High school                   | 19877   | 54 | 38                 | 68 | 1.0             | Reference | 40                | 56 | 1.0             | Reference |
| > High school                   | 17046   | 46 | 18                 | 32 | 0.8             | 0.5 1.5   | 31                | 44 | 1.5             | 0.9 2.5   |
| Ever smoke                      |         |    |                    |    |                 |           |                   |    |                 |           |
| No                              | 23292   | 60 | 27                 | 47 | 1.0             | Reference | 33                | 46 | 1.0             | Reference |
| Yes                             | 15816   | 40 | 30                 | 53 | 1.7             | 1.0 3.0   | 39                | 54 | 1.7             | 1.0 2.8   |
| Alcohol consumption (frequency) |         |    |                    |    |                 |           |                   |    |                 |           |
| Never                           | 16100   | 42 | 29                 | 52 | 1.0             | Reference | 38                | 55 | 1.0             | Reference |
| < 1 to 3 times per month        | 13471   | 35 | 17                 | 30 | 1.0             | 0.5 1.8   | 13                | 19 | 0.6             | 0.3 1.2   |
| Once a week or more             | 8530    | 22 | 10                 | 18 | 0.9             | 0.4 1.8   | 18                | 26 | 1.2             | 0.7 2.3   |
| BMI (kg/m <sup>2</sup> )        |         |    |                    |    |                 |           |                   |    |                 |           |
| <25                             | 12123   | 32 | 21                 | 38 | 1.0             | Reference | 23                | 32 | 1.0             | Reference |
| 25-30                           | 17139   | 45 | 27                 | 49 | 0.9             | 0.5 1.6   | 33                | 46 | 1.0             | 0.6 1.8   |
| >30                             | 8798    | 23 | 7                  | 13 | 0.5             | 0.2 1.2   | 15                | 21 | 1.1             | 0.5 2.1   |

<sup>a</sup> All models include age, gender, and smoking

**Supplemental Table S2. Incident AMD and ever use of specific pesticides, stratified by gender, AHS 1993-2007**

|                        | Men  |    |         |    |                 |        |      | Women |    |         |    |                  |        |      |
|------------------------|------|----|---------|----|-----------------|--------|------|-------|----|---------|----|------------------|--------|------|
|                        | Case |    | Control |    | OR <sup>a</sup> | 95% CI |      | Case  |    | Control |    | OR <sup>a</sup>  | 95% CI |      |
|                        | N    | %  | N       | %  |                 |        |      | N     | %  | N       | %  |                  |        |      |
| Insecticide (any)      | 92   | 97 | 21052   | 93 | 3.1             | 1.0    | 9.7  | 34    | 52 | 7506    | 46 | 1.4              | 0.9    | 2.2  |
| Organochlorines (any)  | 79   | 83 | 13150   | 58 | 2.5             | 1.5    | 4.3  | 19    | 30 | 1720    | 11 | 3.0              | 1.7    | 5.1  |
| Aldrin                 | 36   | 46 | 5257    | 26 | 1.5             | 1.0    | 2.4  |       |    |         |    |                  |        |      |
| Chlordane              | 45   | 55 | 6740    | 33 | 1.7             | 1.1    | 2.6  | 16    | 26 | 956     | 6  | 5.0              | 2.8    | 8.8  |
| DDT                    | 58   | 67 | 6892    | 33 | 1.8             | 1.1    | 2.9  | 12    | 19 | 836     | 5  | 2.8              | 1.5    | 5.3  |
| Dieldrin               | 18   | 23 | 1874    | 9  | 1.6             | 0.9    | 2.8  | 3     | 5  | 86      | 1  | 8.0 <sup>b</sup> | 2.4    | 26.6 |
| Heptachlor             | 34   | 44 | 4305    | 21 | 1.9             | 1.2    | 3.0  |       |    |         |    |                  |        |      |
| Lindane                | 27   | 34 | 4808    | 23 | 1.6             | 1.0    | 2.6  | 5     | 8  | 340     | 2  | 4.5              | 1.8    | 11.5 |
| Toxaphene              | 26   | 33 | 3813    | 19 | 1.5             | 0.9    | 2.4  |       |    |         |    |                  |        |      |
| Organophosphates (any) | 89   | 94 | 20061   | 89 | 2.5             | 1.1    | 5.8  | 28    | 42 | 5096    | 31 | 1.8              | 1.1    | 3.0  |
| Chlorpyrifos           | 41   | 44 | 9696    | 43 | 1.3             | 0.8    | 1.9  | 4     | 6  | 826     | 5  | 1.4              | 0.5    | 4.0  |
| Coumaphos              | 8    | 10 | 2054    | 10 | 1.0             | 0.5    | 2.0  |       |    |         |    |                  |        |      |
| Diazinon               | 45   | 54 | 7371    | 36 | 1.9             | 1.3    | 3.0  | 13    | 21 | 2033    | 13 | 2.1              | 1.1    | 3.9  |
| Dichlorvos             | 12   | 15 | 2594    | 13 | 1.4             | 0.8    | 2.7  | 6     | 10 | 527     | 3  | 3.2              | 1.4    | 7.5  |
| Fonofos                | 19   | 23 | 5078    | 24 | 1.1             | 0.6    | 1.8  |       |    |         |    |                  |        |      |
| Malathion              | 76   | 86 | 15902   | 75 | 2.0             | 1.1    | 3.7  | 27    | 43 | 3987    | 25 | 2.4              | 1.4    | 3.9  |
| Parathion              | 26   | 33 | 3653    | 18 | 1.8             | 1.1    | 2.9  |       |    |         |    |                  |        |      |
| Phorate                | 40   | 51 | 7661    | 37 | 1.8             | 1.2    | 2.8  |       |    |         |    |                  |        |      |
| Terbufos               | 33   | 40 | 8628    | 41 | 1.1             | 0.7    | 1.8  |       |    |         |    |                  |        |      |
| Other insecticides     |      |    |         |    |                 |        |      |       |    |         |    |                  |        |      |
| Aldicarb               | 5    | 6  | 2387    | 12 | 0.5             | 0.2    | 1.3  |       |    |         |    |                  |        |      |
| Carbaryl               | 63   | 74 | 12926   | 61 | 1.4             | 0.9    | 2.3  | 28    | 43 | 5964    | 37 | 1.3              | 0.8    | 2.2  |
| Carbofuran             | 28   | 34 | 6822    | 33 | 1.0             | 0.6    | 1.6  | 3     | 5  | 409     | 3  | 2.2 <sup>b</sup> | 0.7    | 7.1  |
| Permethrin (crops)     | 13   | 16 | 2805    | 14 | 1.6             | 0.9    | 3.0  | 3     | 5  | 392     | 2  | 2.6 <sup>b</sup> | 0.8    | 8.4  |
| Permethrin (animals)   | 5    | 6  | 2886    | 14 | 0.7             | 0.3    | 1.8  | 6     | 9  | 655     | 4  | 3.8              | 1.6    | 8.9  |
| Herbicides (any)       | 94   | 99 | 22149   | 98 | 3.1             | 0.4    | 22.3 | 25    | 38 | 6824    | 42 | 1.1              | 0.7    | 1.8  |
| Phenoxyacetate (any)   | 83   | 87 | 18311   | 81 | 1.8             | 1.0    | 3.2  | 18    | 28 | 2911    | 18 | 1.2              | 0.2    | 9.2  |

|                      |    |    |       |    |     |     |     |    |    |      |    |                  |     |      |
|----------------------|----|----|-------|----|-----|-----|-----|----|----|------|----|------------------|-----|------|
| 2,4,5-T              | 44 | 52 | 5674  | 28 | 1.9 | 1.2 | 2.9 | 2  | 3  | 167  | 1  | 2.6              | 0.6 | 10.8 |
| 2,4,5-TP             | 18 | 23 | 2314  | 11 | 1.8 | 1.1 | 3.1 | 0  | 0  | 76   | 0  | 0.0              | 0.0 |      |
| 2,4-D                | 81 | 86 | 17803 | 79 | 1.8 | 1.0 | 3.2 | 17 | 27 | 2886 | 18 | 1.8              | 1.0 | 3.2  |
| Triazine (any)       | 73 | 77 | 18185 | 80 | 1.1 | 0.7 | 1.8 | 6  | 9  | 1229 | 8  | 0.0              | 0.0 |      |
| Atrazine             | 70 | 74 | 16885 | 75 | 1.2 | 0.8 | 2.0 | 4  | 6  | 1004 | 6  | 1.1 <sup>b</sup> | 0.4 | 3.2  |
| Cyanazine            | 39 | 49 | 9566  | 46 | 1.4 | 0.9 | 2.1 |    |    |      |    |                  |     |      |
| Metribuzin           | 37 | 47 | 10341 | 50 | 1.2 | 0.8 | 1.9 | 3  | 5  | 415  | 3  | 2.1 <sup>b</sup> | 0.7 | 6.8  |
| Other herbicides     |    |    |       |    |     |     |     |    |    |      |    |                  |     |      |
| Alachlor             | 56 | 65 | 12262 | 59 | 1.5 | 1.0 | 2.3 | 3  | 5  | 892  | 6  | 1.0 <sup>b</sup> | 0.3 | 3.1  |
| Butylate             | 28 | 35 | 7564  | 37 | 1.1 | 0.7 | 1.8 |    |    |      |    |                  |     |      |
| Chlorimuron-ethyl    | 28 | 35 | 7513  | 37 | 1.3 | 0.8 | 2.1 |    |    |      |    |                  |     |      |
| Dicamba              | 42 | 52 | 11201 | 54 | 1.2 | 0.8 | 1.9 |    |    |      |    |                  |     |      |
| EPTC                 | 15 | 19 | 4322  | 21 | 1.1 | 0.6 | 1.9 |    |    |      |    |                  |     |      |
| Glyphosate           | 80 | 84 | 17387 | 77 | 1.8 | 1.0 | 3.1 | 23 | 35 | 6106 | 38 | 1.2              | 0.7 | 2.0  |
| Imazethapyr          | 32 | 42 | 8902  | 43 | 1.3 | 0.8 | 2.1 |    |    |      |    |                  |     |      |
| Metolachlor          | 39 | 49 | 10056 | 48 | 1.3 | 0.8 | 2.0 |    |    |      |    |                  |     |      |
| Paraquat             | 29 | 35 | 5273  | 26 | 1.5 | 0.9 | 2.3 |    |    |      |    |                  |     |      |
| Pendimethalin        | 31 | 40 | 9388  | 45 | 1.0 | 0.6 | 1.6 |    |    |      |    |                  |     |      |
| Petroleum oil        | 38 | 47 | 10410 | 51 | 1.0 | 0.6 | 1.5 |    |    |      |    |                  |     |      |
| Trifluralin          | 46 | 57 | 11649 | 56 | 1.2 | 0.8 | 1.9 | 5  | 8  | 1126 | 7  | 1.4              | 0.6 | 3.5  |
| Fungicides (any)     | 41 | 43 | 8232  | 36 | 1.3 | 0.8 | 1.9 | 10 | 16 | 1105 | 7  | 2.5              | 1.2 | 4.9  |
| Benomyl              | 16 | 19 | 2307  | 11 | 1.6 | 0.9 | 2.8 |    |    |      |    |                  |     |      |
| Captan               | 15 | 19 | 2517  | 12 | 1.8 | 1.0 | 3.2 | 5  | 8  | 492  | 3  | 2.7              | 1.1 | 6.9  |
| Chlorothalonil       | 9  | 10 | 1736  | 8  | 1.1 | 0.5 | 2.2 |    |    |      |    |                  |     |      |
| Maneb                | 10 | 13 | 2267  | 11 | 0.9 | 0.5 | 1.8 | 3  | 5  | 360  | 2  | 2.0 <sup>b</sup> | 0.6 | 6.3  |
| Metalaxyl            | 22 | 27 | 5081  | 24 | 1.1 | 0.7 | 1.8 |    |    |      |    |                  |     |      |
| Fumigants (any)      | 28 | 29 | 5604  | 25 | 1.1 | 0.7 | 1.7 |    |    |      |    |                  |     |      |
| Carbon tetrachloride | 11 | 14 | 1404  | 7  | 1.5 | 0.8 | 2.8 |    |    |      |    |                  |     |      |
| Ethylene dibromide   | 10 | 13 | 848   | 4  | 2.9 | 1.5 | 5.7 |    |    |      |    |                  |     |      |
| Methyl bromide       | 17 | 18 | 3829  | 17 | 0.9 | 0.5 | 1.5 |    |    |      |    |                  |     |      |

<sup>a</sup> Adjusted for age and smoking

<sup>b</sup> OR based on fewer than 5 cases

**Supplemental Table S3. Incident early and late AMD and ever use of specific pesticides, AHS 1993-2007**

|                        | Control |    | Early AMD vs Control |    |                  |          | Late AMD vs Control |    |                  |         | Late vs Early AMD <sup>b</sup> |         |
|------------------------|---------|----|----------------------|----|------------------|----------|---------------------|----|------------------|---------|--------------------------------|---------|
|                        | N       | %  | N                    | %  | aOR <sup>a</sup> | 95% CI   | N                   | %  | aOR <sup>a</sup> | 95% CI  | aOR <sup>a</sup>               | 95% CI  |
| Insecticides (any)     | 28558   | 73 | 49                   | 86 | 3.1              | 1.4 7.0  | 59                  | 81 | 1.7              | 0.9 3.3 | 0.5                            | 0.2 1.6 |
| Organochlorines (any)  | 14870   | 38 | 40                   | 70 | 5.1              | 2.6 10.0 | 42                  | 59 | 2.0              | 1.1 3.5 | 0.4                            | 0.2 0.9 |
| Aldrin                 | 5433    | 15 | 19                   | 35 | 2.4              | 1.2 4.8  | 12                  | 21 | 0.9              | 0.4 1.7 | 0.4                            | 0.1 0.9 |
| Chlordane              | 7696    | 21 | 25                   | 45 | 2.9              | 1.5 5.3  | 23                  | 40 | 1.9              | 1.0 3.4 | 0.7                            | 0.3 1.6 |
| DDT                    | 7728    | 21 | 28                   | 51 | 2.8              | 1.4 5.3  | 29                  | 47 | 1.6              | 0.9 2.9 | 0.6                            | 0.2 1.4 |
| Dieldrin               | 1960    | 5  | 13                   | 24 | 3.6              | 1.8 7.3  | 6                   | 11 | 1.0              | 0.4 2.5 | 0.3                            | 0.1 0.9 |
| Heptachlor             | 4490    | 12 | 18                   | 33 | 3.0              | 1.5 5.9  | 13                  | 23 | 1.3              | 0.7 2.7 | 0.4                            | 0.2 1.2 |
| Lindane                | 5148    | 14 | 11                   | 20 | 1.6              | 0.8 3.3  | 13                  | 22 | 1.7              | 0.9 3.3 | 1.1                            | 0.4 2.8 |
| Toxaphene              | 3957    | 11 | 10                   | 18 | 1.3              | 0.6 2.8  | 14                  | 24 | 1.9              | 1.0 3.6 | 1.4                            | 0.5 3.8 |
| Organophosphates (any) | 25157   | 64 | 46                   | 81 | 3.7              | 1.8 7.7  | 53                  | 73 | 1.7              | 0.9 3.1 | 0.5                            | 0.2 1.2 |
| Chlorpyrifos           | 10522   | 27 | 15                   | 26 | 1.7              | 0.9 3.1  | 19                  | 28 | 1.1              | 0.6 2.0 | 1.0                            | 0.4 2.4 |
| Coumaphos              | 2302    | 6  | 4                    | 8  | 1.2              | 0.4 3.5  | 4                   | 6  | 0.9              | 0.3 2.7 | 0.8                            | 0.2 3.3 |
| Diazinon               | 9404    | 26 | 19                   | 34 | 1.5              | 0.8 2.7  | 29                  | 48 | 2.7              | 1.5 4.6 | 1.8                            | 0.8 3.9 |
| Dichlorvos             | 3121    | 9  | 5                    | 9  | 1.2              | 0.5 3.1  | 10                  | 16 | 2.5              | 1.2 4.9 | 2.0                            | 0.6 6.5 |
| Fonofos                | 5463    | 15 | 8                    | 14 | 1.1              | 0.5 2.3  | 8                   | 13 | 0.9              | 0.4 2.0 | 0.9                            | 0.3 2.7 |
| Malathion              | 19889   | 53 | 40                   | 71 | 2.8              | 1.4 5.4  | 45                  | 69 | 2.0              | 1.1 3.6 | 0.7                            | 0.3 1.7 |
| Parathion              | 3877    | 11 | 10                   | 18 | 1.6              | 0.8 3.3  | 14                  | 24 | 2.1              | 1.1 4.2 | 1.3                            | 0.5 3.6 |
| Phorate                | 8070    | 22 | 18                   | 32 | 1.9              | 1.0 3.7  | 17                  | 29 | 1.5              | 0.8 2.9 | 0.8                            | 0.3 2.0 |
| Terbufos               | 9210    | 25 | 17                   | 31 | 1.7              | 0.9 3.2  | 15                  | 23 | 1.0              | 0.5 1.9 | 0.6                            | 0.2 1.5 |
| Other insecticides     |         |    |                      |    |                  |          |                     |    |                  |         |                                |         |
| Aldicarb               | 2511    | 7  | 0                    | 0  |                  |          | 5                   | 9  | 1.2              | 0.5 3.2 |                                |         |
| Carbaryl               | 18890   | 51 | 36                   | 65 | 1.8              | 1.0 3.2  | 41                  | 63 | 1.4              | 0.8 2.4 | 0.8                            | 0.4 1.8 |
| Carbofuran             | 7231    | 20 | 13                   | 24 | 1.3              | 0.7 2.6  | 13                  | 21 | 1.0              | 0.5 1.9 | 0.7                            | 0.3 1.9 |
| Permethrin (crops)     | 3197    | 9  | 9                    | 17 | 2.9              | 1.4 6.2  | 6                   | 9  | 1.4              | 0.6 3.4 | 0.5                            | 0.2 1.5 |
| Permethrin (animals)   | 3541    | 10 | 6                    | 11 | 1.8              | 0.8 4.4  | 4                   | 6  | 1.2              | 0.4 3.3 | 0.6                            | 0.2 2.4 |
| Herbicides (any)       | 28973   | 74 | 43                   | 75 | 1.4              | 0.6 3.0  | 56                  | 78 | 1.5              | 0.7 3.0 | 1.1                            | 0.4 3.0 |
| Phenoxyacetate (any)   | 21222   | 55 | 40                   | 70 | 3.2              | 1.6 6.4  | 43                  | 60 | 1.2              | 0.7 2.3 | 0.4                            | 0.2 1.0 |

|                      |       |    |    |    |     |     |     |    |    |     |     |     |      |     |       |
|----------------------|-------|----|----|----|-----|-----|-----|----|----|-----|-----|-----|------|-----|-------|
| 2,4,5-T              | 5841  | 16 | 21 | 38 | 3.1 | 1.6 | 6.1 | 19 | 31 | 1.7 | 0.9 | 3.1 | 0.5  | 0.2 | 1.4   |
| 2,4,5-TP             | 2390  | 7  | 6  | 11 | 1.5 | 0.6 | 3.5 | 9  | 15 | 2.0 | 0.9 | 4.2 | 1.4  | 0.4 | 4.4   |
| 2,4-D                | 20689 | 54 | 39 | 68 | 2.9 | 1.5 | 5.8 | 41 | 58 | 1.2 | 0.7 | 2.2 | 0.4  | 0.2 | 1.0   |
| Triazine (any)       | 19414 | 50 | 34 | 60 | 2.9 | 1.3 | 6.4 | 34 | 47 | 0.8 | 0.4 | 1.5 | 0.3  | 0.1 | 0.8   |
| Atrazine             | 17889 | 47 | 30 | 53 | 2.0 | 0.9 | 4.3 | 34 | 47 | 1.0 | 0.6 | 1.9 | 0.5  | 0.2 | 1.4   |
| Cyanazine            | 10175 | 28 | 22 | 40 | 2.5 | 1.3 | 4.9 | 14 | 22 | 0.8 | 0.4 | 1.6 | 0.3  | 0.1 | 0.8   |
| Metribuzin           | 10756 | 30 | 17 | 30 | 1.3 | 0.7 | 2.5 | 15 | 26 | 1.0 | 0.5 | 2.0 | 0.8  | 0.3 | 2.0   |
| Other herbicides     |       |    |    |    |     |     |     |    |    |     |     |     |      |     |       |
| Alachlor             | 13154 | 36 | 23 | 42 | 1.7 | 0.8 | 3.2 | 29 | 43 | 1.5 | 0.8 | 2.7 | 0.9  | 0.4 | 2.2   |
| Butylate             | 7886  | 22 | 15 | 27 | 1.7 | 0.9 | 3.3 | 8  | 13 | 0.6 | 0.3 | 1.3 | 0.3  | 0.1 | 1.0   |
| Chlorimuron-ethyl    | 7887  | 22 | 13 | 23 | 1.4 | 0.7 | 2.8 | 10 | 17 | 0.9 | 0.4 | 1.9 | 0.6  | 0.2 | 1.8   |
| Dicamba              | 12012 | 33 | 18 | 33 | 1.2 | 0.6 | 2.4 | 18 | 28 | 0.9 | 0.5 | 1.7 | 0.8  | 0.3 | 1.9   |
| EPTC                 | 4618  | 13 | 6  | 11 | 1.1 | 0.4 | 2.6 | 8  | 13 | 1.2 | 0.6 | 2.6 | 1.1  | 0.4 | 3.7   |
| Glyphosate           | 23493 | 61 | 37 | 65 | 1.5 | 0.8 | 2.7 | 46 | 64 | 1.3 | 0.8 | 2.3 | 0.9  | 0.4 | 2.0   |
| Imazethapyr          | 9503  | 26 | 13 | 24 | 1.1 | 0.6 | 2.2 | 12 | 20 | 1.0 | 0.5 | 1.9 | 0.9  | 0.3 | 2.3   |
| Metolachlor          | 10728 | 29 | 20 | 37 | 2.0 | 1.0 | 4.0 | 15 | 23 | 0.8 | 0.4 | 1.5 | 0.4  | 0.2 | 1.0   |
| Paraquat             | 5542  | 15 | 8  | 14 | 0.9 | 0.4 | 2.0 | 17 | 27 | 2.1 | 1.1 | 3.9 | 2.3  | 0.9 | 6.4   |
| Pendimethalin        | 9912  | 27 | 15 | 27 | 1.1 | 0.6 | 2.2 | 10 | 17 | 0.6 | 0.3 | 1.2 | 0.5  | 0.2 | 1.4   |
| Petroleum oil        | 11165 | 31 | 8  | 15 | 0.3 | 0.2 | 0.8 | 24 | 39 | 1.8 | 1.0 | 3.2 | 5.1  | 1.9 | 13.8  |
| Trifluralin          | 12775 | 35 | 21 | 40 | 1.7 | 0.9 | 3.3 | 20 | 31 | 0.9 | 0.5 | 1.6 | 0.5  | 0.2 | 1.3   |
| Fungicides (any)     | 9337  | 24 | 18 | 33 | 1.6 | 0.8 | 2.9 | 25 | 34 | 1.6 | 0.9 | 2.7 | 1.0  | 0.5 | 2.3   |
| Benomyl              | 2548  | 7  | 1  | 2  |     |     |     | 12 | 19 | 2.7 | 1.4 | 5.4 | 13.3 | 1.6 | 108.0 |
| Captan               | 3009  | 8  | 8  | 15 | 2.2 | 1.0 | 4.7 | 8  | 13 | 1.7 | 0.8 | 3.7 | 0.8  | 0.3 | 2.4   |
| Chlorothalonil       | 1965  | 5  | 4  | 7  | 1.3 | 0.5 | 3.7 | 5  | 7  | 1.2 | 0.5 | 2.9 | 0.9  | 0.2 | 3.5   |
| Maneb                | 2627  | 7  | 4  | 7  | 0.8 | 0.3 | 2.4 | 6  | 10 | 1.2 | 0.5 | 2.8 | 1.4  | 0.4 | 5.3   |
| Metalaxyl            | 5459  | 15 | 8  | 15 | 0.9 | 0.4 | 2.0 | 12 | 19 | 1.3 | 0.7 | 2.7 | 1.5  | 0.5 | 4.1   |
| Fumigants (any)      | 6032  | 16 | 10 | 19 | 1.0 | 0.5 | 2.2 | 12 | 17 | 0.8 | 0.4 | 1.6 | 0.8  | 0.3 | 2.1   |
| Carbon tetrachloride | 1542  | 4  | 3  | 6  | 1.0 | 0.3 | 3.1 | 5  | 8  | 1.3 | 0.5 | 3.4 | 1.4  | 0.3 | 6.3   |
| Ethylene dibromide   | 884   | 2  | 3  | 6  | 2.1 | 0.6 | 6.9 | 5  | 9  | 3.4 | 1.3 | 8.7 | 1.6  | 0.3 | 7.3   |
| Methyl bromide       | 4106  | 11 | 6  | 11 | 0.9 | 0.4 | 2.1 | 8  | 11 | 0.8 | 0.4 | 1.7 | 0.9  | 0.3 | 2.9   |

<sup>a</sup> Adjusted for age, gender, and smoking

<sup>b</sup> Reference group is Early AMD

**Supplemental Table S4. Association of AMD with pesticides modeled as pairs. \***

|            | alone | aldrin | chlordane | DDT | dieldrin | heptachlor | lindane | toxaphene | diazinon | malathion | parathion | phorate | carbaryl | 2,4-D | 2,4,5-T | 2,4,5-TP | glyphosate | paraquat | benomyl |     |
|------------|-------|--------|-----------|-----|----------|------------|---------|-----------|----------|-----------|-----------|---------|----------|-------|---------|----------|------------|----------|---------|-----|
| aldrin     | 1.5   |        | 1.1       | 1.2 | 1.2      | 1.1        |         | 1.4       |          |           |           | 1.2     |          |       | 1.2     |          |            |          |         |     |
| chlordane  | 2.4   | 2.4    |           | 2.1 | 2.3      | 2.2        | 2.3     | 2.4       | 2.1      | 2.0       |           |         |          |       | 2.0     |          |            |          |         |     |
| DDT        | 2.1   | 1.9    | 1.5       |     | 1.9      | 1.9        |         | 2.0       |          |           |           |         |          |       | 1.7     |          |            |          |         |     |
| dieldrin   | 1.9   | 1.8    | 1.4       | 1.6 |          | 1.4        |         | 1.8       |          |           |           |         |          |       | 1.6     | 1.8      |            |          |         |     |
| heptachlor | 1.9   | 1.8    | 1.5       | 1.6 | 1.7      |            | 1.6     | 1.9       |          |           |           | 1.6     |          |       | 1.6     | 1.8      |            |          |         |     |
| lindane    | 1.9   |        | 1.5       |     |          | 1.7        |         |           | 1.6      |           |           |         |          |       |         |          |            |          |         |     |
| toxaphene  | 1.5   | 1.3    | 1.0       | 1.2 | 1.3      | 1.2        |         |           |          |           | 1.2       |         |          |       |         |          |            |          |         |     |
| diazinon   | 2.0   |        | 1.5       |     |          |            | 1.7     |           |          | 1.6       | 1.7       |         | 1.9      |       |         |          |            |          |         |     |
| malathion  | 2.2   |        | 1.9       |     |          |            |         |           |          |           |           | 2.2     | 1.9      |       |         |          | 2.1        |          |         |     |
| parathion  | 1.9   |        |           |     |          |            | 1.7     |           |          |           |           |         |          |       |         |          |            | 1.9      | 2.0     |     |
| phorate    | 1.7   | 1.6    |           |     |          | 1.5        |         |           |          |           |           |         |          |       |         |          |            |          |         |     |
| carbaryl   | 1.4   |        |           |     |          |            |         |           | 1.1      | 1.1       |           |         |          |       |         |          |            |          |         | 1.3 |
| 2,4-D      | 2.0   |        |           |     |          |            |         |           |          | 1.4       |           |         |          |       |         |          |            |          |         | 1.7 |
| 2,4,5-T    | 1.7   | 1.8    | 1.6       | 1.7 | 1.7      | 1.6        |         |           |          |           |           |         |          |       |         |          |            |          |         | 1.9 |
| 2,4,5-TP   | 1.8   |        |           |     | 1.2      | 1.2        |         |           |          |           |           |         |          |       | 1.1     |          |            |          |         |     |
| glyphosate | 1.4   |        |           |     |          |            |         |           | 1.1      |           |           | 1.3     | 1.3      |       |         |          |            |          |         |     |
| paraquat   | 1.5   |        |           |     |          |            |         |           |          |           | 1.2       |         |          |       |         |          |            |          |         | 1.3 |
| benomyl    | 1.7   |        |           |     |          |            |         |           |          |           | 1.0       |         |          |       |         |          |            |          | 1.4     |     |

\*The table includes all pesticides correlated with at least one other pesticide ( $r \geq 0.25$ ), where at least one of the pair was associated with AMD risk. Each ROW shows ORs for a particular pesticide modeled either by itself ("alone") or in the presence of the correlated pesticides indicated in the COLUMNS. Bolded ORs had CIs that excluded 1.0. Blanks indicate that the pair was not correlated ( $r < 0.25$ ).

**Supplemental Table S5. Association of AMD with selected pesticides and pesticide groups. Comparison of ORs from the manuscript with those calculated after imputing case-control status to individuals not screened.**

| Exposure                     | Original Analysis <sup>a</sup> |         | Scenario 1 <sup>b</sup> |         | Scenario 2 <sup>c</sup> |         | Scenario 3 <sup>d</sup> |         |
|------------------------------|--------------------------------|---------|-------------------------|---------|-------------------------|---------|-------------------------|---------|
|                              | OR                             | 95% CI  | OR                      | 95% CI  | OR                      | 95% CI  | OR                      | 95% CI  |
| Organochlorine insecticides  | 2.7                            | 1.8-4.0 | 2.2                     | 1.7-2.9 | 2.6                     | 1.9-3.5 | 1.8                     | 1.3-2.4 |
| Organophosphate insecticides | 2.0                            | 1.3-3.0 | 1.8                     | 1.3-2.5 | 2.2                     | 1.6-3.0 | 1.5                     | 1.1-2.0 |
| Phenoxyacetate herbicides    | 1.9                            | 1.2-2.8 | 1.6                     | 1.2-2.3 | 2.0                     | 1.5-2.8 | 1.4                     | 1.0-1.9 |
| Chlordane                    | 2.4                            | 1.7-3.6 | 2.0                     | 1.5-2.8 | 2.5                     | 1.8-3.3 | 1.6                     | 1.2-2.1 |
| DDT                          | 2.1                            | 1.4-3.1 | 1.8                     | 1.3-2.5 | 2.3                     | 1.7-3.1 | 1.5                     | 1.1-2.0 |
| Heptachlor                   | 1.9                            | 1.2-3.0 | 2.2                     | 1.6-3.1 | 2.6                     | 1.9-3.6 | 1.7                     | 1.2-2.3 |
| Diazinon                     | 2.0                            | 1.4-2.9 | 2.0                     | 1.5-2.6 | 2.3                     | 1.8-3.0 | 1.6                     | 1.2-2.1 |
| Malathion                    | 2.2                            | 1.5-3.3 | 2.0                     | 1.5-2.7 | 2.4                     | 1.8-3.3 | 1.6                     | 1.2-2.1 |
| Phorate                      | 1.7                            | 1.1-2.6 | 1.8                     | 1.3-2.5 | 2.2                     | 1.6-3.0 | 1.5                     | 1.1-2.0 |
| 2,4,5-T                      | 2.0                            | 1.3-3.0 | 1.4                     | 0.9-2.9 | 1.8                     | 1.2-2.8 | 1.2                     | 0.8-1.8 |
| 2,4-D                        | 1.8                            | 1.2-2.7 | 1.6                     | 1.2-2.2 | 1.9                     | 1.4-2.5 | 1.4                     | 1.0-1.9 |
| Captan                       | 2.0                            | 1.2-3.3 | 1.8                     | 1.2-2.7 | 2.1                     | 1.4-3.1 | 1.6                     | 1.1-2.4 |

<sup>a</sup> From Table 2 in the manuscript

<sup>b</sup> With the addition of individuals whose case-control status was imputed based on covariate values as described in the text

<sup>c</sup> With the addition of individuals whose case-control status was imputed after increasing the probability that exposed would be cases by a factor of 1.25 and decreasing the probability that they would be controls by a factor of 1.25

<sup>d</sup> With the addition of individuals whose case-control status was imputed after decreasing the probability that exposed would be cases by a factor of 1.25 and increasing the probability that they would be controls by a factor of 1.25



## Quantitative Bias Analysis

Because relatively few of the individuals designated as potential cases were confirmed as cases and included in the analysis, we undertook a quantitative bias analysis to assess selection bias attributable to non-response within this sub-group. The potential cases were 1328 subjects that we expected to be enriched for actual cases (Figure 1 in the manuscript). By their nature, such bias analyses require assigning speculative, but one hopes reasonably defensible, values to certain unknown parameters. Sometimes, a validation sub-study or external information can offer guidance – but we had no such information to guide our choice of values. We proceeded as follows.

First, we divided the 1328 subjects into 769 responders (for whom we had reached an AMD/noAMD decision) and 559 non-responders; the latter category also included individuals whose medical records were not obtained (n=34) or for whom a decision on diagnosis could not be reached (n=6). Logistic regression adjusted for age, gender, smoking, and Amsler-grid use indicated that, for 35 of the 55 pesticides or groupings in Table 2, OR estimates for the association of being a responder with exposure exceeded 1; however, only eight had 95% confidence limits that excluded 1 (among those with ORs less than 1, none of the 95% CIs excluded 1). Thus, we had some evidence that ever-use of some pesticides was associated with the propensity to respond among our potential cases. We had, however, no data to evaluate whether this association of propensity to respond with exposure might differ by actual case status (determined as described in the manuscript) – knowledge that could have helped us to allocate the non-responders to case-control status.

Trying to accomplish this allocation in a principled way in the face of this unknown, we modeled our approach after one in Lash et al.'s (2009) text *Applying Quantitative Bias Analysis to Epidemiologic Data*. They call the approach “projecting the exposed proportion among non-participants.” Our version differs from their example in four respects: we know the exposures but have to project case-control status; we do not have the benefit of the short questionnaire among a subset of non-participants that they utilize; we have to account for several additional covariates besides exposure; and our process involves only potential cases so that, after projecting case-control status for non-responders in that subset, we have to carry them into the full case-control analysis.

We used the probability of being a case among responders in the potential case group as a starting point. Using responders only, we fit a “case/control” logistic regression with age, gender, smoking, exposure, Amsler-grid use, and exposure\*Amsler-grid use; we included this interaction because we wanted to allow the case allocation to differ among the two large subcategories of potential cases. We used results of this logistic regression to estimate the probability that a responder was a case conditional on all the covariates, giving separate probabilities for the  $3 \times 2 \times 2 \times 2 \times 2 = 48$  separate covariate-defined cells. We categorized the non-responders into the same 48 covariate-defined cells for allocation into case or controls status. We considered three scenarios to bracket reasonable possibilities: (1) we applied the estimated probabilities directly to allocate the non-responders; (2) we increased the estimated probability for exposed by 1.25 times and decreased it by 1.25 times for unexposed before allocating the non-responders; (3) we decreased the probability for exposed by 1.25 times and increased the probability for unexposed 1.25 times before allocating the non-responders. We ensured that the

resulting probabilities were always between 0 and 1. Note that the value 1.25 here is arbitrary; it seemed to us to offer a reasonably strong differential (1.25 squared, or over 1.5-fold) between exposed and unexposed non-responders in the probability of being allocated as a case.

We allocated the potential cases who did not respond to the screening interview under each of the three scenarios by multiplying the estimated probability of being a case by the number of non-responders in the covariate-defined cell; the number of controls in that cell was then the number of non-responders minus the expected number of cases. These values were not necessarily integer but entered the subsequent analysis using weights. For each scenario, we took these additional designated cases and controls, appended them to the cases and controls from our entire original sample, and fit the case-control analysis reported in Table 2 using the enlarged data set.

The following table presents results of this analysis for selected pesticide exposures – those judged to be “consistent” as described in the manuscript. Scenario 1 attenuates most (but not all) ORs somewhat compared to their values in Table 2 in the manuscript but only for 2,4,5-T does the CI contain the null value; Scenario 2 increases most (but not all) ORs slightly compared to their values in Table 2; Scenario 3 attenuates ORs even more strongly than does Scenario 1 but again only for 2,4,5-T does the CI contain the null value (phenoxyacetate herbicides and 2,4-D have lower confidence limits that exceed 1 in the second or third decimal place despite being listed as 1.0 in the table).

Thus, this quantitative bias analysis indicates that all the pesticides highlighted in the manuscript as enhancing risk of AMD (with the possible exception of 2,4,5-T) are also seen to enhance risk in each of the three selection-bias scenarios that we considered, albeit often with ORs attenuated toward the null. We conclude that our results were not produced by selection bias.

## **References**

Lash TL, Fox M, Fink AK. 2009. *Applying Quantitative Bias Analysis to Epidemiologic Data*. New York: Springer, 43 – 58.
